# Supplementary material for: Anticancer Effects of Thymoquinone through the Antioxidant Activity, Upregulation of Nrf2, and Downregulation of PD-L1 in Triple-Negative Breast Cancer Cells
Source: MDPI journal article supplement (doi:10.3390/nu14224787), 2022-11-13
Supplement: s1 [file s1]

1. Nrf2 protein expression in TQ treated INF-γ stimulated MDA-MB-231 TNBC cells

A.

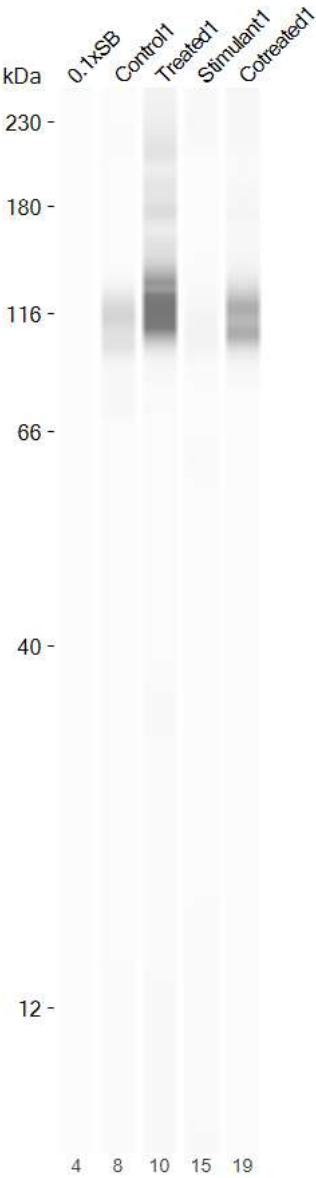

| Peaks      |         | Capillaries |      |      |           |          |        |         |        |       |       |          |
|------------|---------|-------------|------|------|-----------|----------|--------|---------|--------|-------|-------|----------|
| Sample     | Prim... | Cap         | Peak | Name | Positi... | MW (...) | Height | Area    | % Area | Width | S/N   | Baseline |
| Control1   | Nrf2    | 8           | 1    |      | 627       | 116      | 308.1  | 5587.7  |        | 17.0  | 40.0  | 40.8     |
| Treated1   | Nrf2    | 10          | 1    |      | 624       | 121      | 477.6  | 2030... |        | 39.9  | 11... | 55.9     |
| Stimulant1 | Nrf2    | 15          | 1    |      | 620       | 104      | 144.9  | 1604.5  |        | 10.4  | 27.7  | 56.6     |
| Cotreated1 | Nrf2    | 19          | 1    |      | 624       | 109      | 351.7  | 1187... |        | 31.7  | 79.4  | 33.8     |

B.

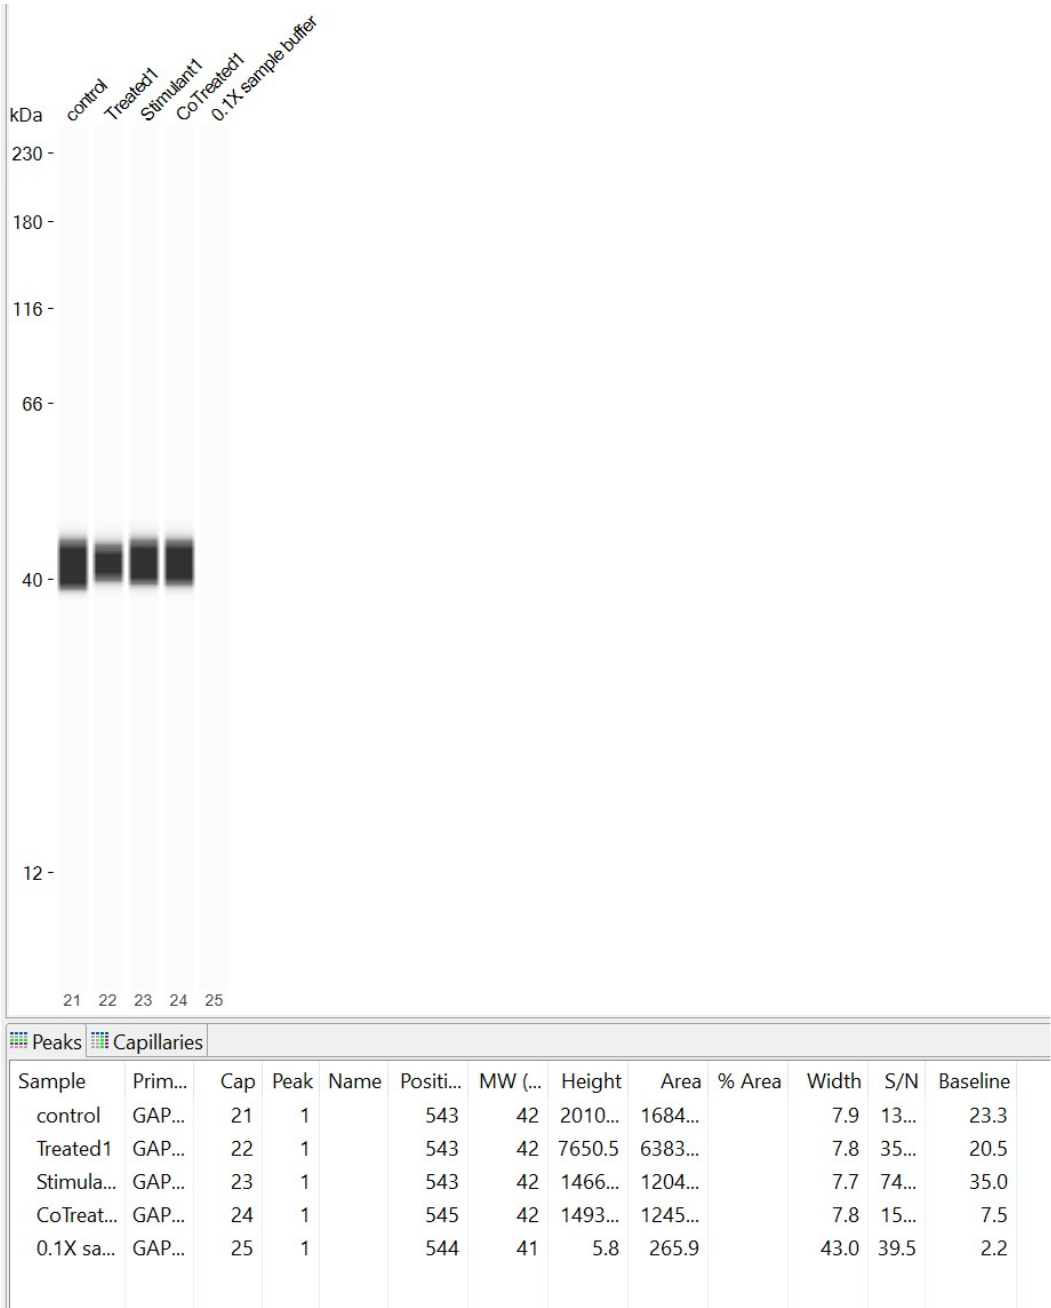

C.

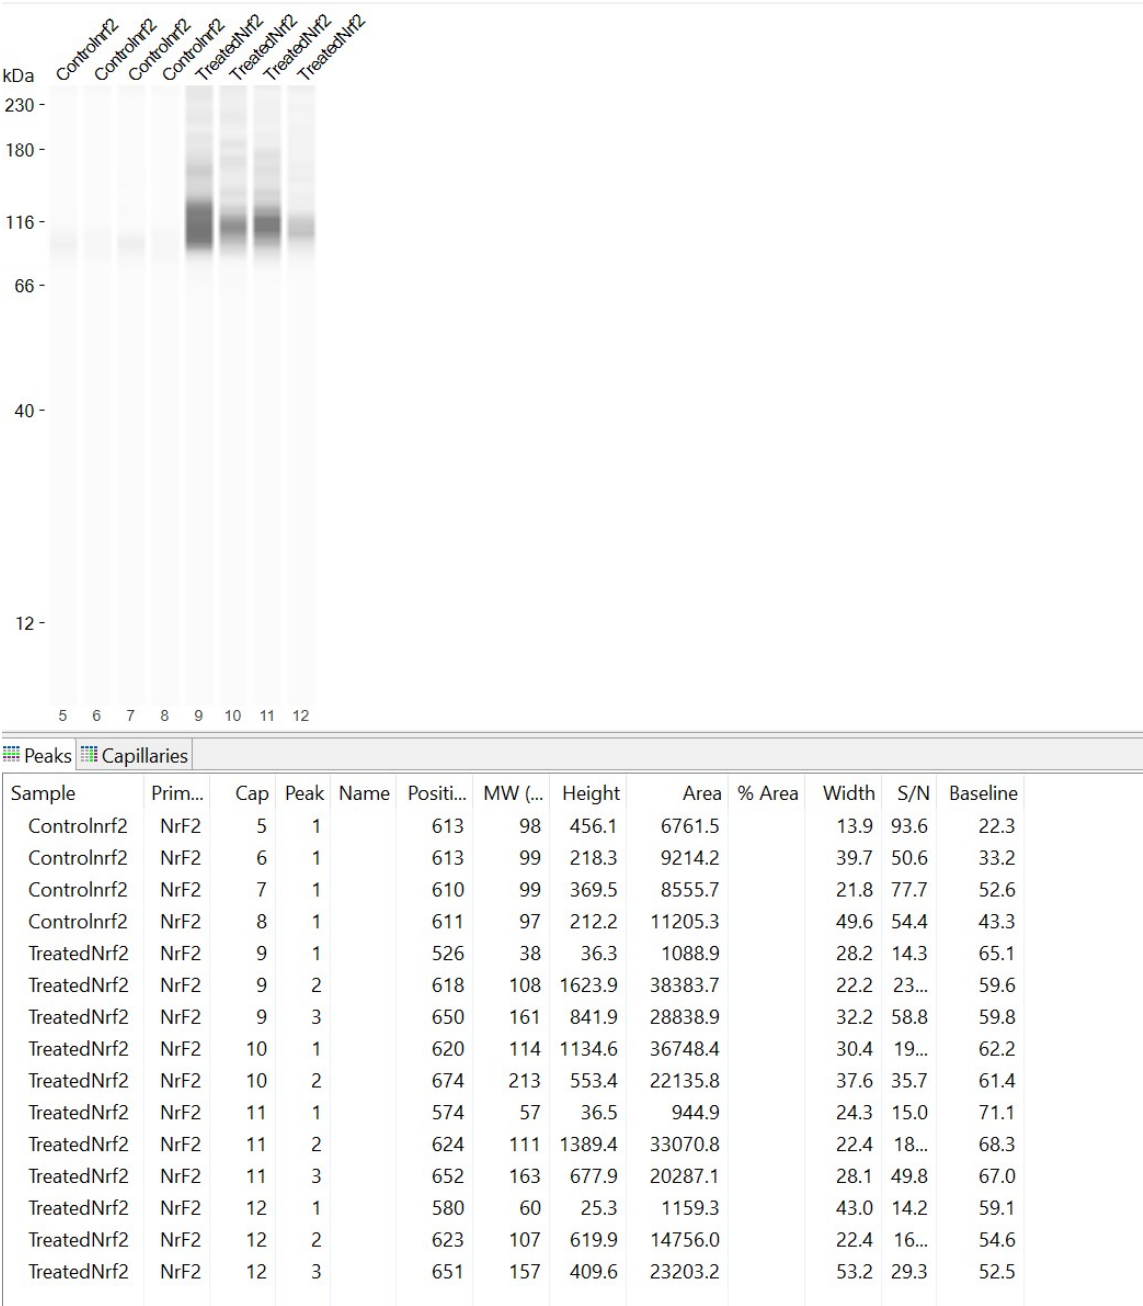

**Supplement Figure S1.** Nrf2 protein expression in TQ treated INF-Y stimulated MDA-MB-231 TNBC cells. Following the overnight incubation period, cells were equally treated with 15  $\mu$ M of TQ for 24. A. Blot for Nrf2 protein expression in control, treated, stimulated and cotreated MDA-MB-231 cell. B. Blot for protein expression of GAPDH used for normalization. C. Blot for Nrf2 protein expression in control and TQ treated MDA-MB-231 cell in triplicates.

2. Nrf2 protein expression in TQ treated INF-γ stimulated MDA-MB-468 TNBC cell

A.

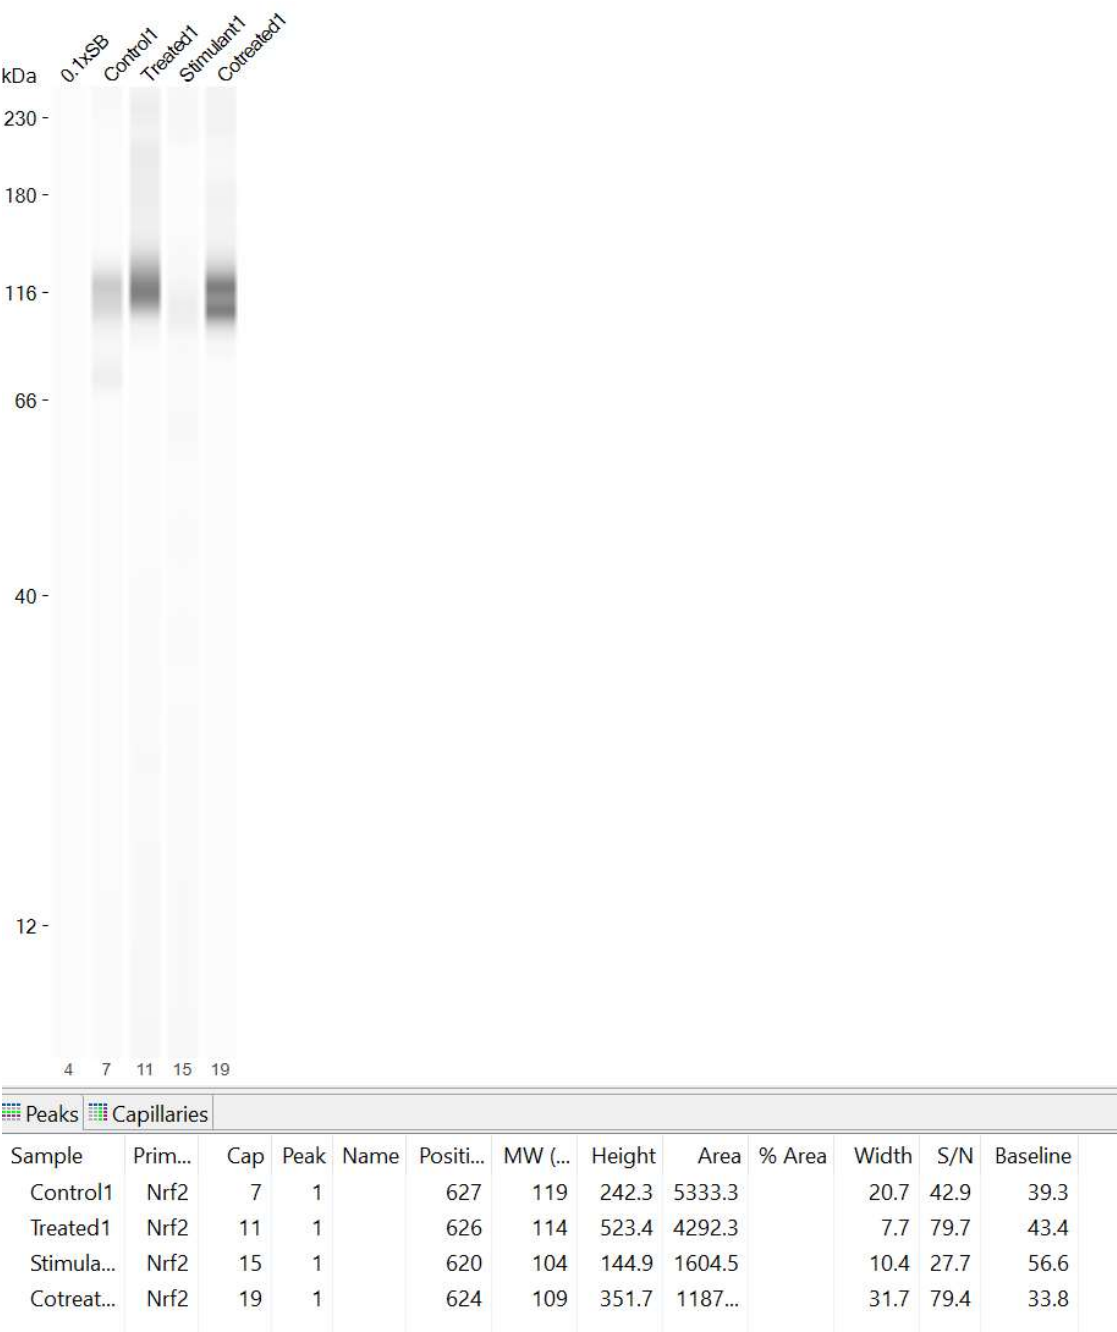

B.

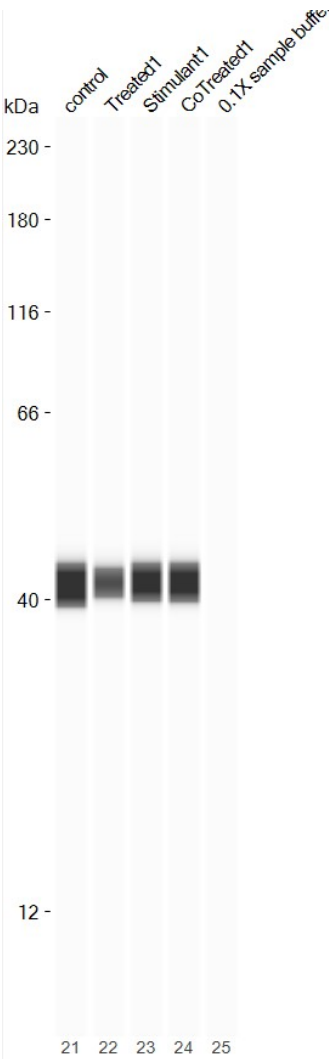

| Peaks        |         |     |      |      |           |          |         |         |        |       |       |          |
|--------------|---------|-----|------|------|-----------|----------|---------|---------|--------|-------|-------|----------|
| Capillaries  |         |     |      |      |           |          |         |         |        |       |       |          |
| Sample       | Prim... | Cap | Peak | Name | Positi... | MW (...) | Height  | Area    | % Area | Width | S/N   | Baseline |
| control      | GAP...  | 21  | 1    |      | 543       | 42       | 2010... | 1684... |        | 7.9   | 13... | 23.3     |
| Treated1     | GAP...  | 22  | 1    |      | 543       | 42       | 7650.5  | 6383... |        | 7.8   | 35... | 20.5     |
| Stimulant1   | GAP...  | 23  | 1    |      | 543       | 42       | 1466... | 1204... |        | 7.7   | 74... | 35.0     |
| CoTreated1   | GAP...  | 24  | 1    |      | 545       | 42       | 1493... | 1245... |        | 7.8   | 15... | 7.5      |
| 0.1X samp... | GAP...  | 25  | 1    |      | 544       | 41       | 5.8     | 265.9   |        | 43.0  | 39.5  | 2.2      |

C.

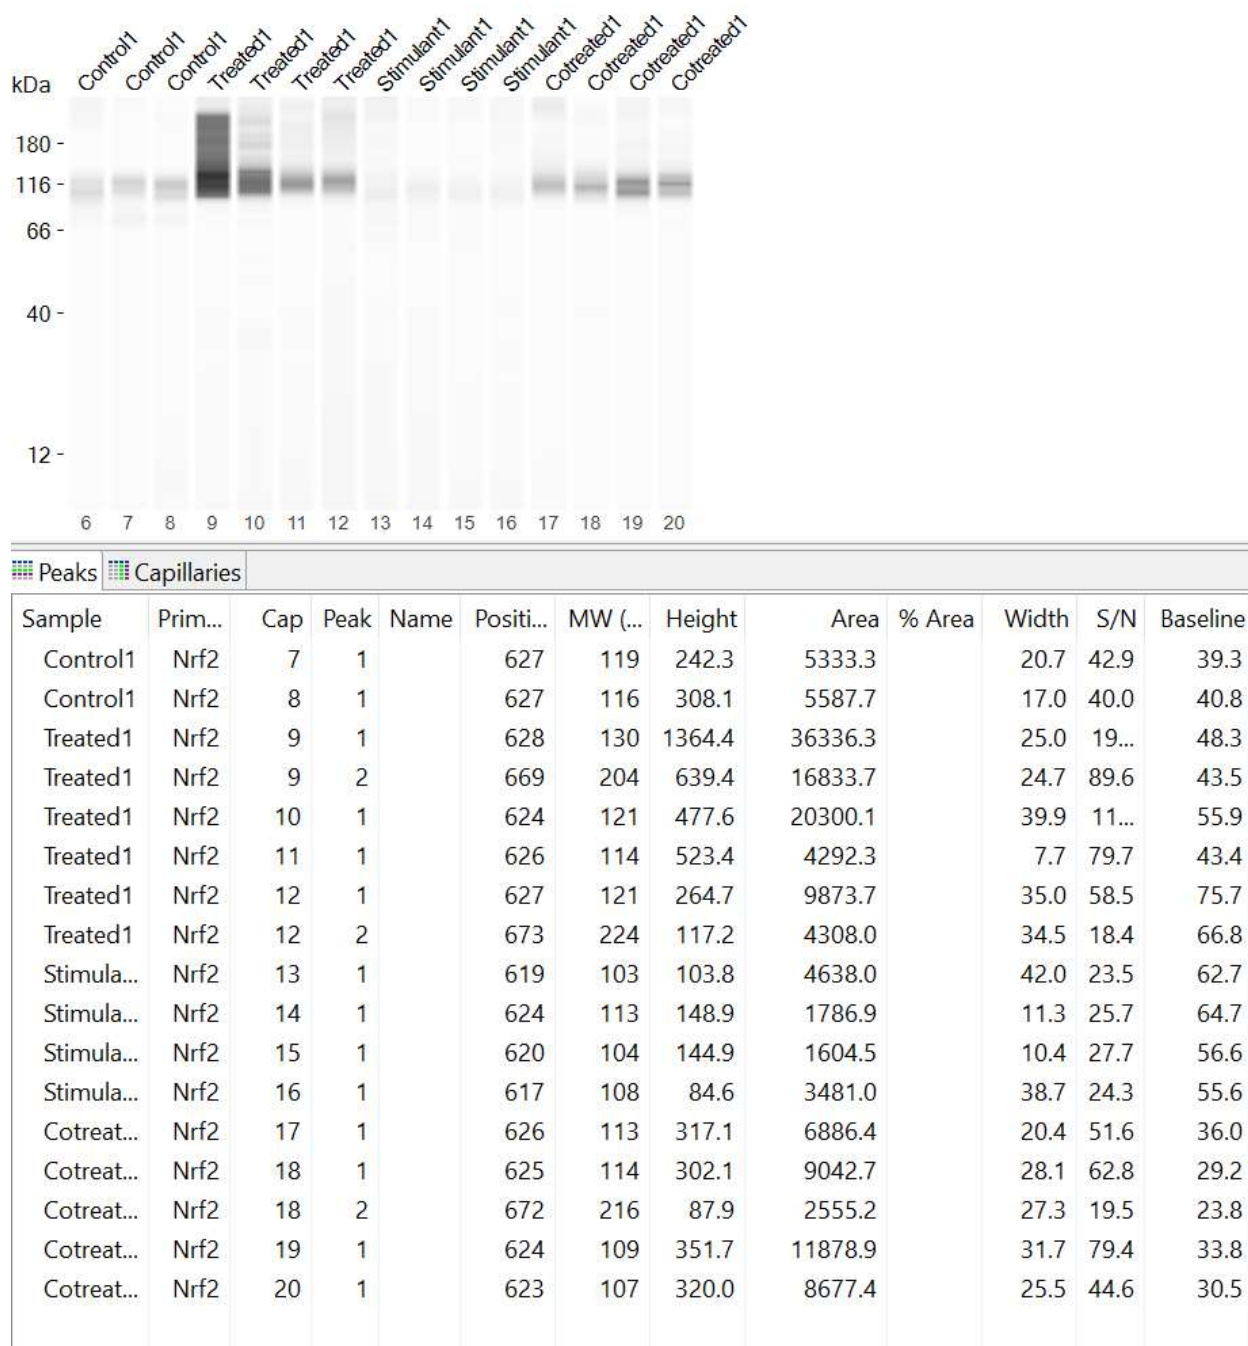

**Figure S2.** Nrf2 protein expression in TQ treated INF- $\gamma$  stimulated MDA-MB-468TNBC cells. Following the overnight incubation period, cells were equally treated with 15  $\mu$ M of TQ for 24. A. Blot for Nrf2 protein expression in control, treated, stimulated and cotreated MDA-MB-468 cell. B. Blot for protein expression of GAPDH used for normalization. C. . Blot for Nrf2 protein expression in control, treated, stimulated and cotreated MDA-MB-468 cell in different replicates.

3. PD-L1 protein expression in TQ treated INF-γ stimulated MDA-MB-231 TNBC cells

A

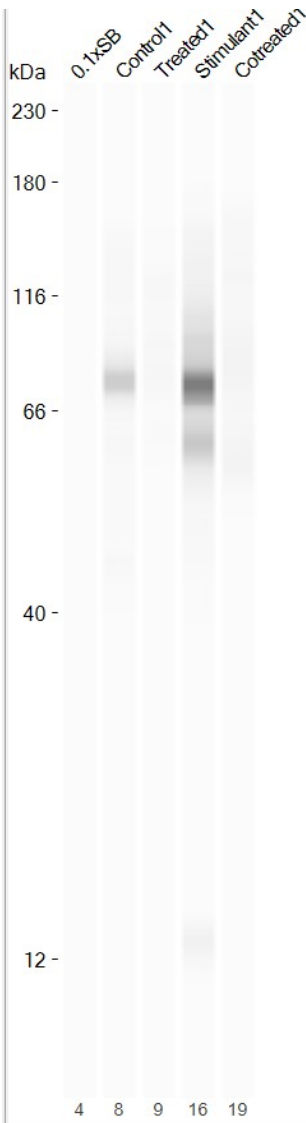

| Peaks      |         | Capillaries |      |      |           |          |        |         |        |       |       |          |
|------------|---------|-------------|------|------|-----------|----------|--------|---------|--------|-------|-------|----------|
| Sample     | Prim... | Cap         | Peak | Name | Positi... | MW (...) | Height | Area    | % Area | Width | S/N   | Baseline |
| Control1   | PDL-1   | 8           | 1    |      | 610       | 78       | 1726.5 | 2523... |        | 13.7  | 13... | 126.4    |
| Stimulant1 | PDL-1   | 16          | 1    |      | 457       | 14       | 500.9  | 1595... |        | 29.9  | 91.6  | 98.2     |
| Stimulant1 | PDL-1   | 16          | 2    |      | 591       | 62       | 679.1  | 2207... |        | 30.5  | 10... | 137.5    |
| Stimulant1 | PDL-1   | 16          | 3    |      | 607       | 78       | 2092.5 | 7529... |        | 33.8  | 22... | 144.9    |
| Cotreated1 | PDL-1   | 19          | 1    |      | 589       | 59       | 556.4  | 1368... |        | 23.1  | 45.0  | 121.4    |
| Cotreated1 | PDL-1   | 19          | 2    |      | 617       | 82       | 726.7  | 2135... |        | 27.6  | 27.2  | 124.8    |
| Cotreated1 | PDL-1   | 19          | 3    |      | 655       | 146      | 541.5  | 1569... |        | 27.2  | 29.8  | 128.0    |

B.

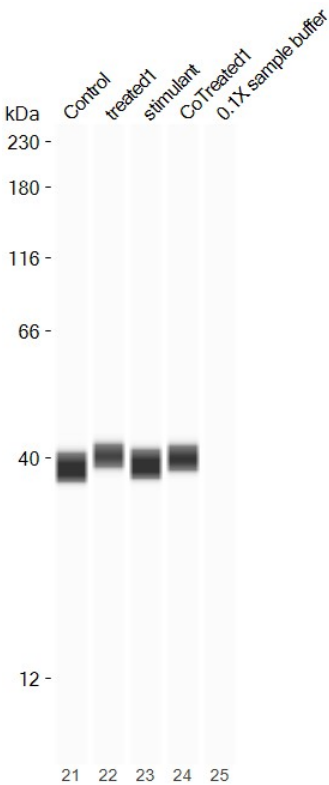

| Peaks         |         | Capillaries |      |      |           |          |         |         |        |       |       |          |
|---------------|---------|-------------|------|------|-----------|----------|---------|---------|--------|-------|-------|----------|
| Sample        | Prim... | Cap         | Peak | Name | Positi... | MW (...) | Height  | Area    | % Area | Width | S/N   | Baseline |
| Control       | GAP...  | 21          | 1    |      | 500       | 26       | 208.8   | 2000.0  |        | 9.0   | 68.2  | 46.3     |
| Control       | GAP...  | 21          | 2    |      | 543       | 39       | 2265... | 1971... |        | 8.2   | 91... | 46.7     |
| Control       | GAP...  | 21          | 3    |      | 632       | 114      | 2711.8  | 3994... |        | 13.8  | 24... | 47.7     |
| Control       | GAP...  | 21          | 4    |      | 653       | 155      | 2279.6  | 3132... |        | 12.9  | 19... | 47.9     |
| treated1      | GAP...  | 22          | 1    |      | 550       | 40       | 1394... | 1194... |        | 8.0   | 43... | 46.0     |
| treated1      | GAP...  | 22          | 2    |      | 613       | 82       | 545.2   | 7492.3  |        | 12.9  | 26.6  | 49.3     |
| treated1      | GAP...  | 22          | 3    |      | 625       | 98       | 805.1   | 1229... |        | 14.3  | 29.4  | 50.0     |
| treated1      | GAP...  | 22          | 4    |      | 653       | 147      | 1214.2  | 2036... |        | 15.8  | 10... | 51.7     |
| stimulant     | GAP...  | 23          | 1    |      | 500       | 26       | 695.8   | 7015.5  |        | 9.5   | 23... | 17.0     |
| stimulant     | GAP...  | 23          | 2    |      | 543       | 39       | 2276... | 1957... |        | 8.1   | 83... | 14.0     |
| stimulant     | GAP...  | 23          | 3    |      | 606       | 77       | 1462.0  | 2044... |        | 13.1  | 35.5  | 12.4     |
| stimulant     | GAP...  | 23          | 4    |      | 622       | 109      | 1990.1  | 2903... |        | 13.7  | 30.4  | 12.4     |
| stimulant     | GAP...  | 23          | 5    |      | 647       | 145      | 1822.7  | 2554... |        | 13.2  | 13... | 12.8     |
| CoTreated1    | GAP...  | 24          | 1    |      | 548       | 40       | 1639... | 1396... |        | 8.0   | 59... | 30.8     |
| CoTreated1    | GAP...  | 24          | 2    |      | 621       | 100      | 1001.6  | 1360... |        | 12.8  | 43.1  | 34.1     |
| CoTreated1    | GAP...  | 24          | 3    |      | 648       | 141      | 1045.4  | 1392... |        | 12.5  | 10... | 35.3     |
| 0.1X sampl... | GAP...  | 25          | 1    |      | 547       | 39       | 46.9    | 1557.9  |        | 31.2  | 12... | 1.6      |

C.



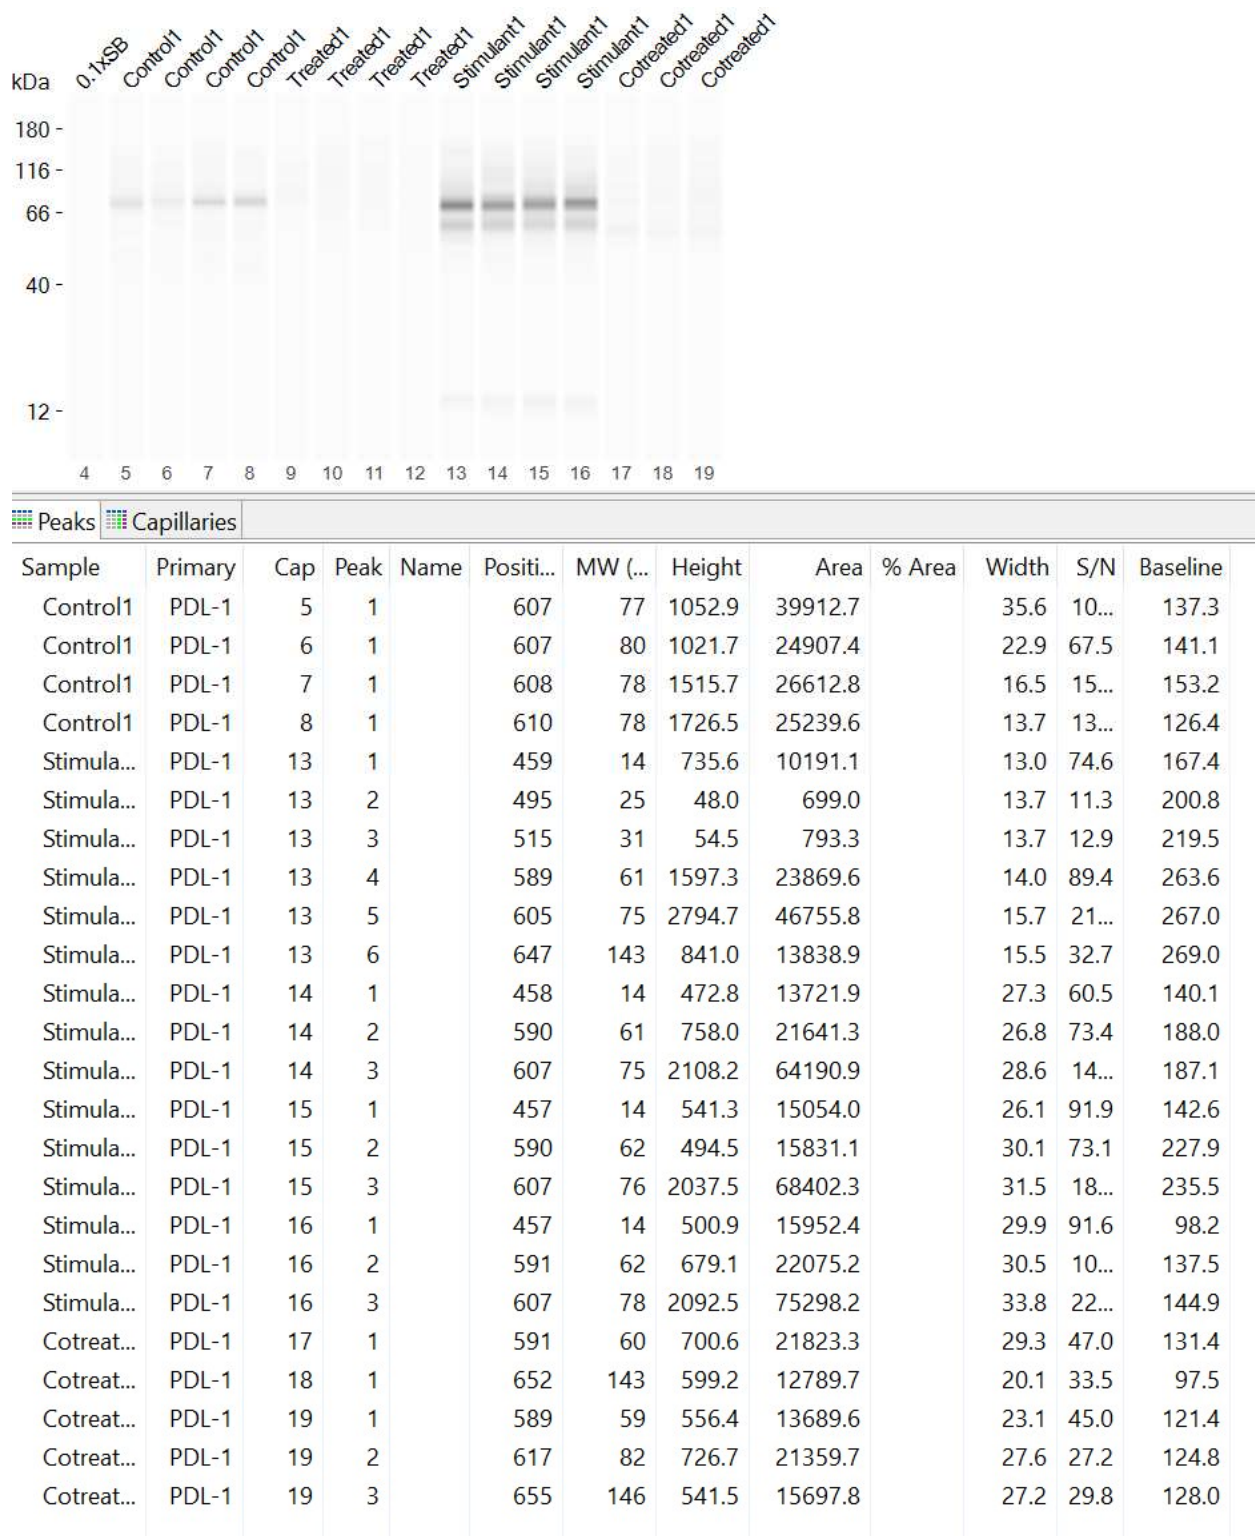

**Figure 3.** PD-L1 protein expression in TQ treated INF-Y stimulated MDA-MB-231 TNBC cells. Following the overnight incubation period, cells were equally treated with 15  $\mu$ M of TQ for 24. A. Blot for PD-L1 protein expression in control, treated, stimulated and cotreated MDA-MB-231 cell. B. Blot for protein expression of GAPDH used for normalization.

4. PD-L1 protein expression in TQ treated INF-γ stimulated MDA-MB-468 TNBC cells

A.

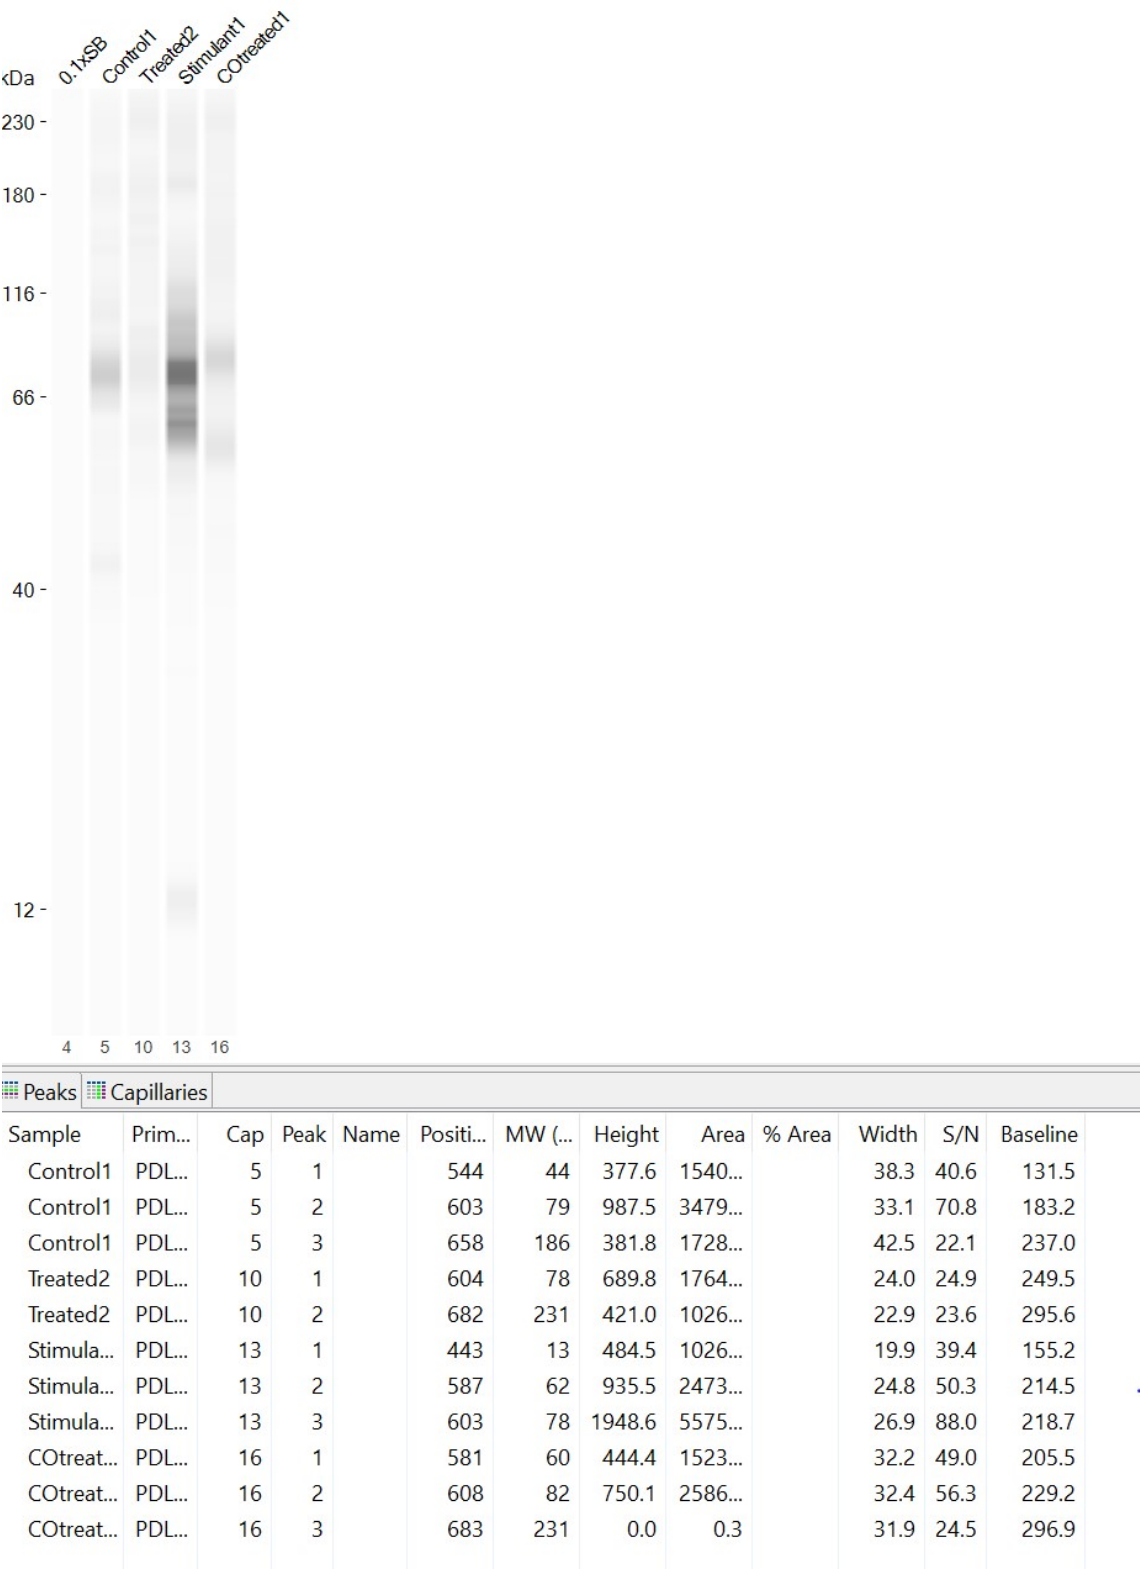

B.

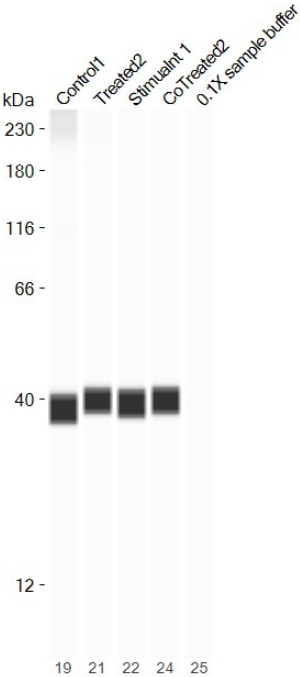

| Peaks      |         | Capillaries |      |      |           |          |         |         |        |       |       |          |
|------------|---------|-------------|------|------|-----------|----------|---------|---------|--------|-------|-------|----------|
| Sample     | Prim... | Cap         | Peak | Name | Positi... | MW (...) | Height  | Area    | % Area | Width | S/N   | Baseline |
| Control1   | GAP...  | 19          | 1    |      | 491       | 26       | 319.9   | 3073.5  |        | 9.0   | 69.7  | 96.8     |
| Control1   | GAP...  | 19          | 2    |      | 532       | 38       | 1933... | 1758... |        | 8.5   | 52... | 101.2    |
| Control1   | GAP...  | 19          | 3    |      | 627       | 115      | 3057.8  | 3373... |        | 10.4  | 26... | 107.8    |
| Control1   | GAP...  | 19          | 4    |      | 678       | 226      | 1011... | 1191... |        | 11.1  | 80... | 109.9    |
| Control1   | GAP...  | 19          | 5    |      | 690       | 249      | 1165... | 1427... |        | 11.5  | 10... | 110.3    |
| Treated2   | GAP...  | 21          | 1    |      | 539       | 40       | 1534... | 1306... |        | 8.0   | 37... | 89.3     |
| Treated2   | GAP...  | 21          | 2    |      | 608       | 90       | 1086.7  | 1984... |        | 17.2  | 24.6  | 101.5    |
| Treated2   | GAP...  | 21          | 3    |      | 648       | 158      | 1444.8  | 2823... |        | 18.4  | 31.1  | 106.9    |
| Treated2   | GAP...  | 21          | 4    |      | 682       | 229      | 3295.1  | 7269... |        | 20.7  | 24... | 110.9    |
| Stimual... | GAP...  | 22          | 1    |      | 490       | 26       | 441.2   | 4471.8  |        | 9.5   | 16... | 64.7     |
| Stimual... | GAP...  | 22          | 2    |      | 536       | 39       | 1795... | 1632... |        | 8.5   | 72... | 90.9     |
| Stimual... | GAP...  | 22          | 3    |      | 582       | 60       | 366.1   | 4256.2  |        | 10.9  | 20.3  | 124.1    |
| Stimual... | GAP...  | 22          | 4    |      | 628       | 117      | 1249.5  | 1711... |        | 12.9  | 67.4  | 162.2    |
| Stimual... | GAP...  | 22          | 5    |      | 646       | 149      | 1098.0  | 1456... |        | 12.5  | 44.8  | 178.0    |
| Stimual... | GAP...  | 22          | 6    |      | 678       | 225      | 1891.7  | 2915... |        | 14.5  | 26... | 206.8    |
| CoTreat... | GAP...  | 24          | 1    |      | 541       | 40       | 1628... | 1436... |        | 8.3   | 73... | 83.9     |
| CoTreat... | GAP...  | 24          | 2    |      | 620       | 98       | 619.3   | 8284.3  |        | 12.6  | 57.7  | 156.1    |
| CoTreat... | GAP...  | 24          | 3    |      | 683       | 225      | 1635.9  | 2634... |        | 15.1  | 23... | 227.4    |
| 0.1X sa... | GAP...  | 25          | 1    |      | 540       | 39       | 13.2    | 1279.6  |        | 91.3  | 26... | 0.6      |

C.

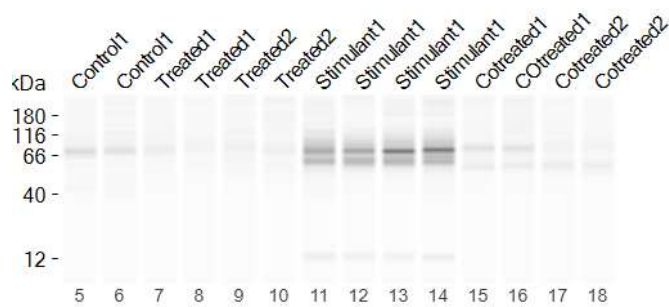

| Peaks      |         | Capillaries |      |      |           |          |        |         |        |       |      |          |
|------------|---------|-------------|------|------|-----------|----------|--------|---------|--------|-------|------|----------|
| Sample     | Primary | Cap         | Peak | Name | Positi... | MW (...) | Height | Area    | % Area | Width | S/N  | Baseline |
| Control1   | PDL-1   | 5           | 1    |      | 544       | 44       | 377.6  | 15401.7 |        | 38.3  | 40.6 | 131.5    |
| Control1   | PDL-1   | 5           | 2    |      | 603       | 79       | 987.5  | 34799.8 |        | 33.1  | 70.8 | 183.2    |
| Control1   | PDL-1   | 5           | 3    |      | 658       | 186      | 381.8  | 17284.3 |        | 42.5  | 22.1 | 237.0    |
| Control1   | PDL-1   | 6           | 1    |      | 602       | 80       | 597.3  | 62888.2 |        | 98.9  | 77.5 | 195.8    |
| Treated1   | PDL-1   | 7           | 1    |      | 607       | 84       | 818.3  | 24417.0 |        | 28.0  | 33.1 | 169.1    |
| Treated2   | PDL-1   | 10          | 1    |      | 604       | 78       | 689.8  | 17641.9 |        | 24.0  | 24.9 | 249.5    |
| Treated2   | PDL-1   | 10          | 2    |      | 682       | 231      | 421.0  | 10267.0 |        | 22.9  | 23.6 | 295.6    |
| Stimula... | PDL-1   | 11          | 1    |      | 441       | 13       | 359.4  | 14058.2 |        | 36.8  | 53.8 | 168.5    |
| Stimula... | PDL-1   | 11          | 2    |      | 585       | 62       | 331.5  | 14928.7 |        | 42.3  | 58.5 | 267.7    |
| Stimula... | PDL-1   | 11          | 3    |      | 604       | 78       | 1612.3 | 76080.5 |        | 44.3  | 50.2 | 275.0    |
| Stimula... | PDL-1   | 12          | 1    |      | 441       | 12       | 686.2  | 10324.7 |        | 14.1  | 52.3 | 140.8    |
| Stimula... | PDL-1   | 12          | 2    |      | 585       | 63       | 1715.2 | 27172.5 |        | 14.9  | 59.9 | 244.0    |
| Stimula... | PDL-1   | 12          | 3    |      | 603       | 79       | 1909.1 | 30474.4 |        | 15.0  | 59.9 | 255.6    |
| Stimula... | PDL-1   | 12          | 4    |      | 683       | 239      | 426.3  | 6570.5  |        | 14.5  | 26.6 | 296.2    |
| Stimula... | PDL-1   | 13          | 1    |      | 443       | 13       | 484.5  | 10267.7 |        | 19.9  | 39.4 | 155.2    |
| Stimula... | PDL-1   | 13          | 2    |      | 587       | 62       | 935.5  | 24733.1 |        | 24.8  | 50.3 | 214.5    |
| Stimula... | PDL-1   | 13          | 3    |      | 603       | 78       | 1948.6 | 55753.5 |        | 26.9  | 88.0 | 218.7    |
| Stimula... | PDL-1   | 14          | 1    |      | 444       | 13       | 441.3  | 13867.3 |        | 29.5  | 54.9 | 158.5    |
| Stimula... | PDL-1   | 14          | 2    |      | 589       | 62       | 639.7  | 24419.3 |        | 35.9  | 40.3 | 265.7    |
| Stimula... | PDL-1   | 14          | 3    |      | 607       | 81       | 1787.3 | 67359.7 |        | 35.4  | 77.3 | 280.6    |
| Stimula... | PDL-1   | 14          | 4    |      | 662       | 187      | 685.5  | 25012.9 |        | 34.3  | 21.4 | 327.2    |
| Stimula... | PDL-1   | 14          | 5    |      | 679       | 227      | 0.0    | 0.3     |        | 29.9  | 28.2 | 341.8    |
| Cotreat... | PDL-1   | 15          | 1    |      | 442       | 12       | 79.2   | 1985.3  |        | 23.6  | 12.3 | 107.2    |
| Cotreat... | PDL-1   | 15          | 2    |      | 580       | 58       | 666.1  | 16145.8 |        | 22.8  | 53.5 | 169.4    |
| Cotreat... | PDL-1   | 15          | 3    |      | 609       | 87       | 928.8  | 26715.9 |        | 27.0  | 77.3 | 185.5    |
| Cotreat... | PDL-1   | 15          | 4    |      | 681       | 222      | 430.1  | 12300.1 |        | 26.9  | 31.0 | 227.9    |
| COtreat... | PDL-1   | 16          | 1    |      | 581       | 60       | 444.4  | 15235.7 |        | 32.2  | 49.0 | 205.5    |
| COtreat... | PDL-1   | 16          | 2    |      | 608       | 82       | 750.1  | 25864.7 |        | 32.4  | 56.3 | 229.2    |
| COtreat... | PDL-1   | 16          | 3    |      | 683       | 231      | 0.0    | 0.3     |        | 31.9  | 24.5 | 296.9    |
| Cotreat... | PDL-1   | 17          | 1    |      | 584       | 59       | 894.6  | 15593.6 |        | 16.4  | 41.4 | 134.2    |
| Cotreat... | PDL-1   | 17          | 2    |      | 608       | 81       | 718.2  | 12669.9 |        | 16.6  | 19.1 | 136.6    |
| Cotreat... | PDL-1   | 17          | 3    |      | 680       | 231      | 447.2  | 7774.3  |        | 16.3  | 20.5 | 141.9    |
| Cotreat... | PDL-1   | 18          | 1    |      | 583       | 59       | 958.0  | 14968.0 |        | 14.7  | 54.6 | 107.8    |



D.

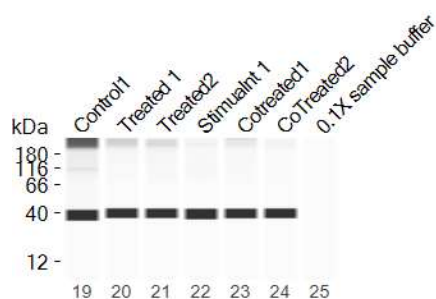

| Peaks      |         | Capillaries |      |      |           |          |         |           |        |       |       |          |
|------------|---------|-------------|------|------|-----------|----------|---------|-----------|--------|-------|-------|----------|
| Sample     | Primary | Cap         | Peak | Name | Positi... | MW (...) | Height  | Area      | % Area | Width | S/N   | Baseline |
| Control1   | GAPDH   | 19          | 1    |      | 491       | 26       | 319.9   | 3073.5    |        | 9.0   | 69.7  | 96.8     |
| Control1   | GAPDH   | 19          | 2    |      | 532       | 38       | 1933... | 1758672.6 |        | 8.5   | 52... | 101.2    |
| Control1   | GAPDH   | 19          | 3    |      | 627       | 115      | 3057.8  | 33739.1   |        | 10.4  | 26... | 107.8    |
| Control1   | GAPDH   | 19          | 4    |      | 678       | 226      | 1011... | 119181.5  |        | 11.1  | 80... | 109.9    |
| Control1   | GAPDH   | 19          | 5    |      | 690       | 249      | 1165... | 142728.4  |        | 11.5  | 10... | 110.3    |
| Treated 1  | GAPDH   | 20          | 1    |      | 538       | 40       | 1562... | 1340560.5 |        | 8.1   | 31... | 107.5    |
| Treated 1  | GAPDH   | 20          | 2    |      | 648       | 163      | 1383.8  | 23262.3   |        | 15.8  | 27.5  | 126.4    |
| Treated 1  | GAPDH   | 20          | 3    |      | 689       | 236      | 3906.7  | 80083.9   |        | 19.3  | 20... | 131.0    |
| Treated2   | GAPDH   | 21          | 1    |      | 539       | 40       | 1534... | 1306211.3 |        | 8.0   | 37... | 89.3     |
| Treated2   | GAPDH   | 21          | 2    |      | 608       | 90       | 1086.7  | 19844.4   |        | 17.2  | 24.6  | 101.5    |
| Treated2   | GAPDH   | 21          | 3    |      | 648       | 158      | 1444.8  | 28237.5   |        | 18.4  | 31.1  | 106.9    |
| Treated2   | GAPDH   | 21          | 4    |      | 682       | 229      | 3295.1  | 72694.2   |        | 20.7  | 24... | 110.9    |
| Stimual... | GAPDH   | 22          | 1    |      | 490       | 26       | 441.2   | 4471.8    |        | 9.5   | 16... | 64.7     |
| Stimual... | GAPDH   | 22          | 2    |      | 536       | 39       | 1795... | 1632468.4 |        | 8.5   | 72... | 90.9     |
| Stimual... | GAPDH   | 22          | 3    |      | 582       | 60       | 366.1   | 4256.2    |        | 10.9  | 20.3  | 124.1    |
| Stimual... | GAPDH   | 22          | 4    |      | 628       | 117      | 1249.5  | 17118.1   |        | 12.9  | 67.4  | 162.2    |
| Stimual... | GAPDH   | 22          | 5    |      | 646       | 149      | 1098.0  | 14568.9   |        | 12.5  | 44.8  | 178.0    |
| Stimual... | GAPDH   | 22          | 6    |      | 678       | 225      | 1891.7  | 29158.2   |        | 14.5  | 26... | 206.8    |
| Cotreat... | GAPDH   | 23          | 1    |      | 540       | 39       | 1673... | 1430883.5 |        | 8.0   | 59... | 64.7     |
| Cotreat... | GAPDH   | 23          | 2    |      | 619       | 99       | 1024.9  | 14406.8   |        | 13.2  | 30.5  | 75.0     |
| Cotreat... | GAPDH   | 23          | 3    |      | 649       | 155      | 1258.2  | 18625.8   |        | 13.9  | 40.3  | 78.1     |
| Cotreat... | GAPDH   | 23          | 4    |      | 679       | 221      | 2183.5  | 31538.0   |        | 13.6  | 19... | 80.8     |
| CoTreat... | GAPDH   | 24          | 1    |      | 541       | 40       | 1628... | 1436378.5 |        | 8.3   | 73... | 83.9     |
| CoTreat... | GAPDH   | 24          | 2    |      | 620       | 98       | 619.3   | 8284.3    |        | 12.6  | 57.7  | 156.1    |
| CoTreat... | GAPDH   | 24          | 3    |      | 683       | 225      | 1635.9  | 26348.9   |        | 15.1  | 23... | 227.4    |
| 0.1X sa... | GAPDH   | 25          | 1    |      | 540       | 39       | 13.2    | 1279.6    |        | 91.3  | 26... | 0.6      |

**Figure S4.** PD-L1 protein expression in TQ treated INF- $\gamma$  stimulated MDA-MB-468 TNBC cells. Following the overnight incubation period, cells were equally treated with 15  $\mu$ M of TQ for 24. A. Blot for PD-L1 protein expression in control, treated, stimulated and cotreated MDA-MB-468 cell. B. Blot for protein expression of GAPDH used for normalization. C. Blot for PD-L1 protein expression in control, treated, stimulated and cotreated MDA-MB-468 cell. D. Blot for protein expression of GAPDH used for normalization.
